# Supplementary material
Source: HighWire-hosted journal article supplement (http://www.jneurosci.org/highwire/filestream/600125/field_highwire_adjunct_files/0/Figure_S1.pdf)
Supplement: Figure_S1.pdf [file Figure_S1.pdf]

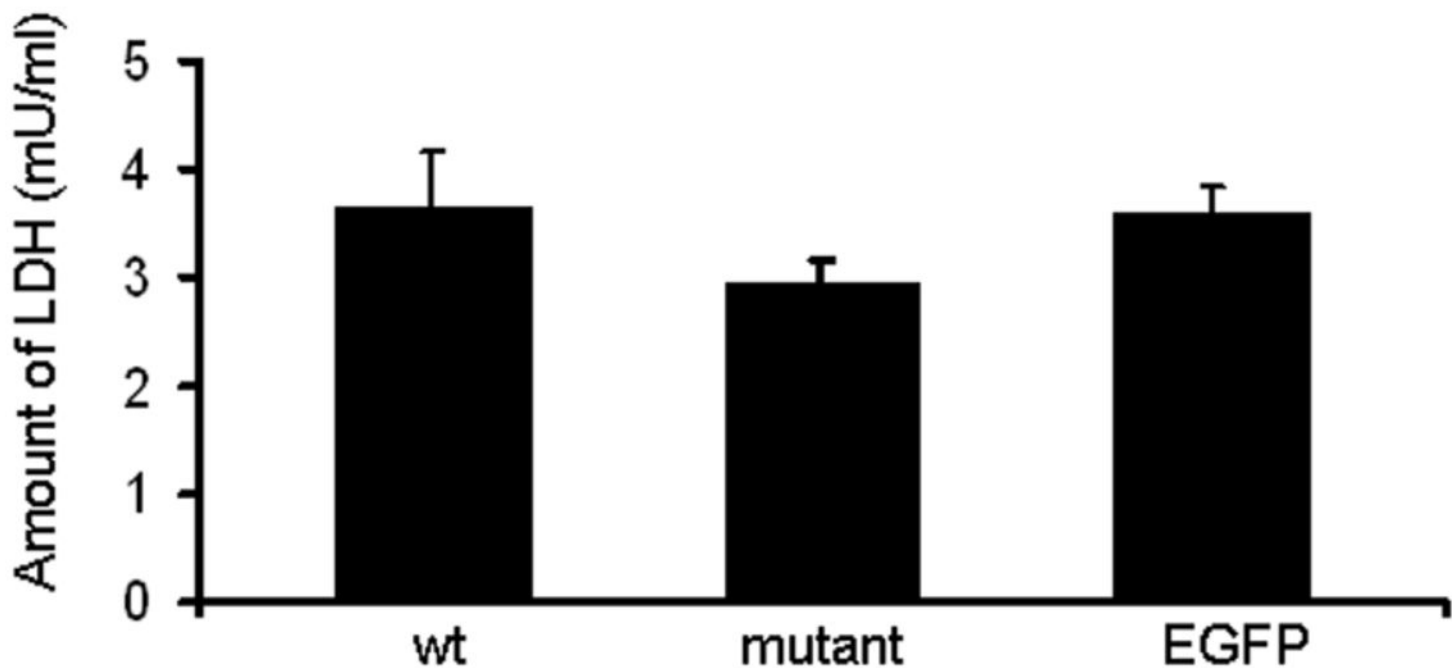

*Supplementary Fig 1.* At 48 hours post transfection, there is no difference in the amount of lactate dehydrogenase (LDH) released by cells expressing P2X7-EGFP (wt; n=5), P2X7RG345Y-EGFP (mutant, n=5) or EGFP (n=6) alone. This finding, indicates that in our primary culture setting P2X7R expression does not drive cytolysis. One Way ANOVA,  $p > 0.05$ .
